# Supplementary material
Source: PubMed Central journal article supplement (PMC4003872)
Supplement: NIHMS565877-supplement-Supplementary_Data.pdf [file NIHMS565877-supplement-Supplementary_Data.pdf]

## Supplementary Information:

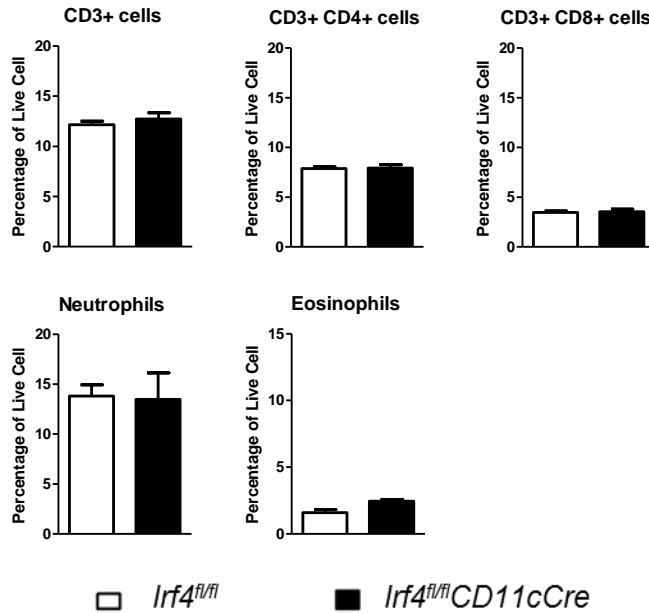

### Supplementary Figure S1: *Irf4<sup>fl/fl</sup>CD11cCre* mice have normal lung cellularity.

Unsensitized and unchallenged *Irf4<sup>fl/fl</sup>* or *Irf4<sup>fl/fl</sup>CD11cCre* mice were sacrificed and assayed for immune cells in the lungs. The percent of lung CD3<sup>+</sup> cells, CD4<sup>+</sup> T cells, CD8<sup>+</sup> T cells, Neutrophils, and Eosinophils were identified by flow cytometry. Data represent the mean  $\pm$  SEM (statistical test by student t-test). Data are from three or four animals per group.

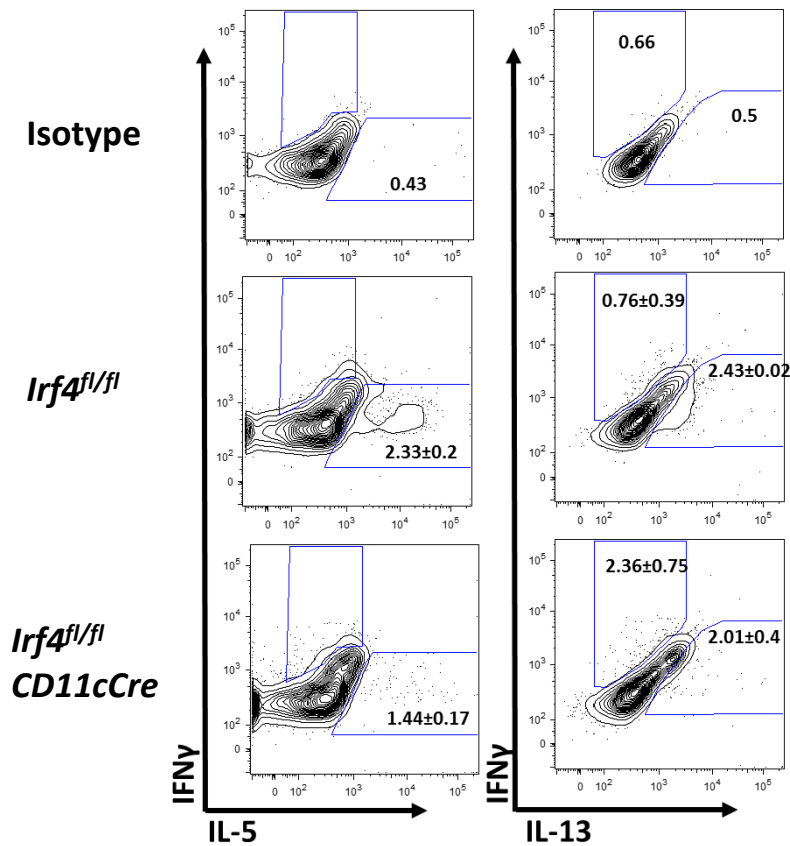

**Supplementary Figure S2: Intracellular cytokine staining of T cells from the lungs of HDM-challenged mice.** Lung T cells from HDM sensitized and challenged *Irf4<sup>fl/fl</sup>* or *Irf4<sup>fl/fl</sup>CD11cCre* mice were stimulated with PMA/Ionomycin, followed by intracellular cytokine staining for IL-5, IL-13, IFN $\gamma$ , or appropriate isotype controls. Data represent the mean  $\pm$ SEM. Data are representative of two independent experiments with three to six mice per group.

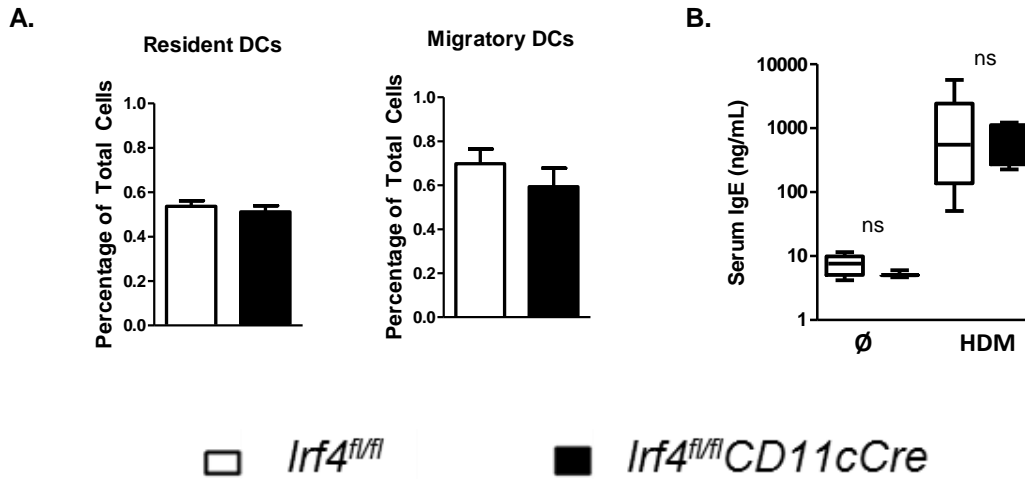

**Supplementary Figure S3: *Irf4<sup>fl/fl</sup>CD11cCre* mice show similar DC migration and IgE responses following HDM sensitization and challenge.** (A) Mediastinal lymph nodes from HDM sensitized and challenged *Irf4<sup>fl/fl</sup>* or *Irf4<sup>fl/fl</sup>CD11cCre* mice were assayed for infiltration of migratory and resident DC populations. (B) Serum from unchallenged or sensitized and challenged mice were assayed for total IgE levels. Data represent the mean  $\pm$  SEM (statistical test by student t-test). Data is representative of two independent experiments with four to six replicates per group.

**A. BAL**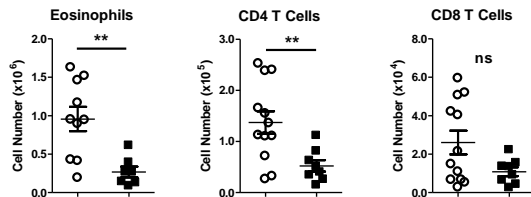**B. Lung**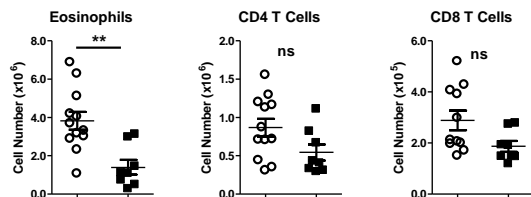**C. Lung**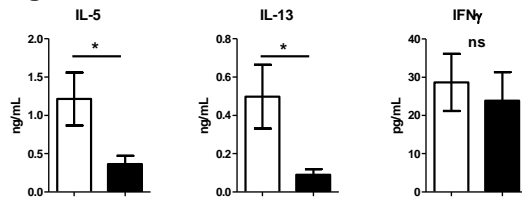

□ *Irf4<sup>fl/fl</sup>*      ■ *Irf4<sup>fl/fl</sup>CD11cCre*

**D.**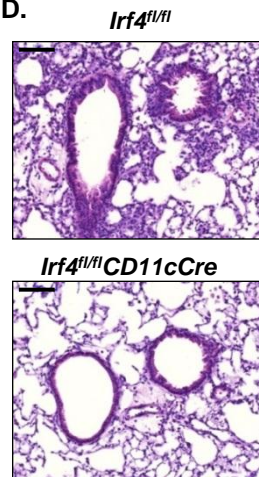**E.**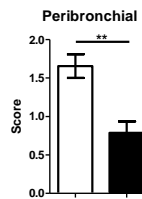

**Supplementary Figure S4: IRF4 in DCs regulates the development of Th2 responses toward HDM.** *Irf4<sup>fl/fl</sup>* or *Irf4<sup>fl/fl</sup>CD11cCre* mice were sensitized i.p. with HDM/Alum and challenged i.t. with HDM, then sacrificed at the peak of inflammation on day 4 after challenge. (A) BAL eosinophil, CD4<sup>+</sup>, and CD8<sup>+</sup> T cells numbers recovered from sensitized and challenged mice. (B) Lung eosinophil, CD4<sup>+</sup>, and CD8<sup>+</sup> T cell numbers recovered from sensitized and challenged mice. (C) Lung T cells were restimulated and measured for secreted cytokines. (D) H&E stains of lung from sensitized/challenged (top) *Irf4<sup>fl/fl</sup>* and (bottom) *Irf4<sup>fl/fl</sup>CD11cCre* mice. (E) Peribronchovascular scoring of lung sections from sensitized and challenged mice for cellular infiltration. Histology bar = 100  $\mu$ m. Data represent the mean  $\pm$  SEM (statistical test by student t-test; \*,  $P < 0.05$ ; \*\*,  $P < 0.01$ ; \*\*\*,  $P < 0.001$ ). Data are representative of three independent experiments, with three to six replicates per experiment.

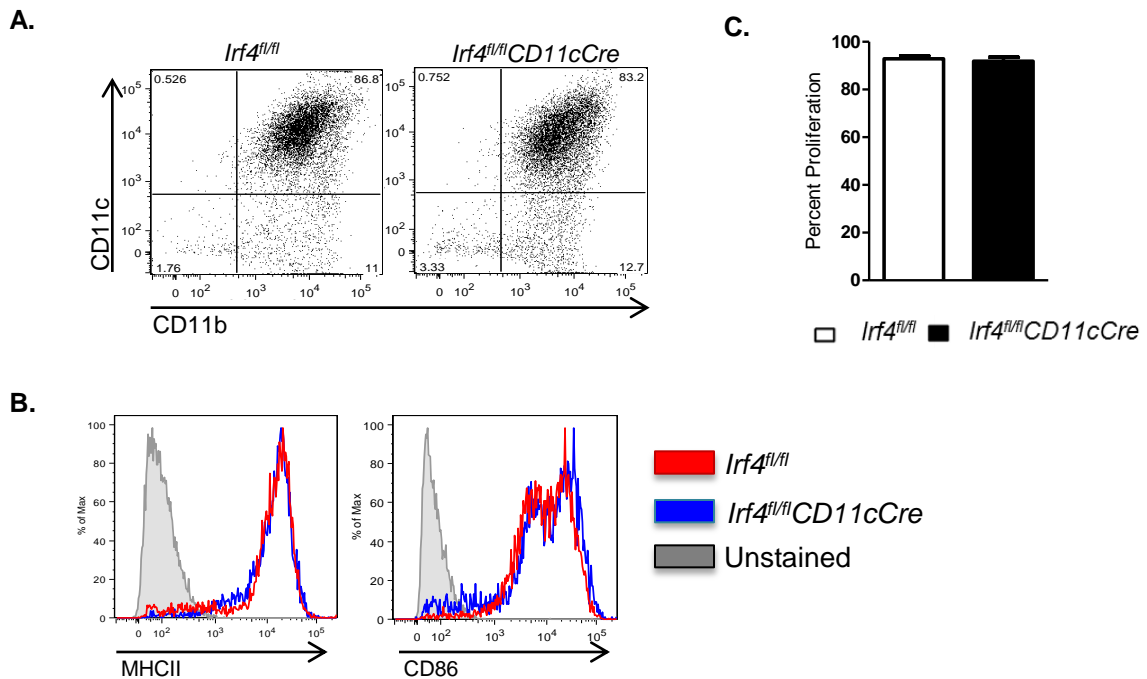

**Supplementary Figure S5: *Irf4<sup>fl/fl</sup>CD11cCre* BMDCs develop and are activated similar to *Irf4<sup>fl/fl</sup>* BMDCs.** (A) BMDCs from *Irf4<sup>fl/fl</sup>* or *Irf4<sup>fl/fl</sup>CD11cCre* mice were assayed for CD11c<sup>+</sup> CD11b<sup>+</sup> cells. (B) BMDCs were activated with LPS for eight hours and assayed for expression of MHCII and CD86. (C) *Irf4<sup>fl/fl</sup>* or *Irf4<sup>fl/fl</sup>CD11cCre* BMDCs were activated with LPS and used to present OVA to CFSE-labeled OTII cells, and T cell proliferation was measured five days later. Data represent the mean  $\pm$  SEM (statistical test by student t-test). Data are representative of three or more independent experiments.

## A. GMCSF BMDCs

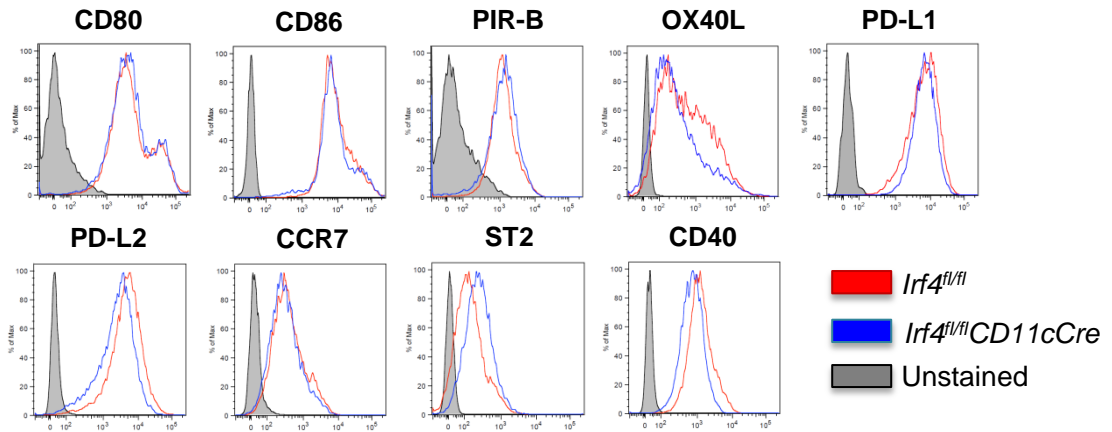

## B. Flt3L BMDCs

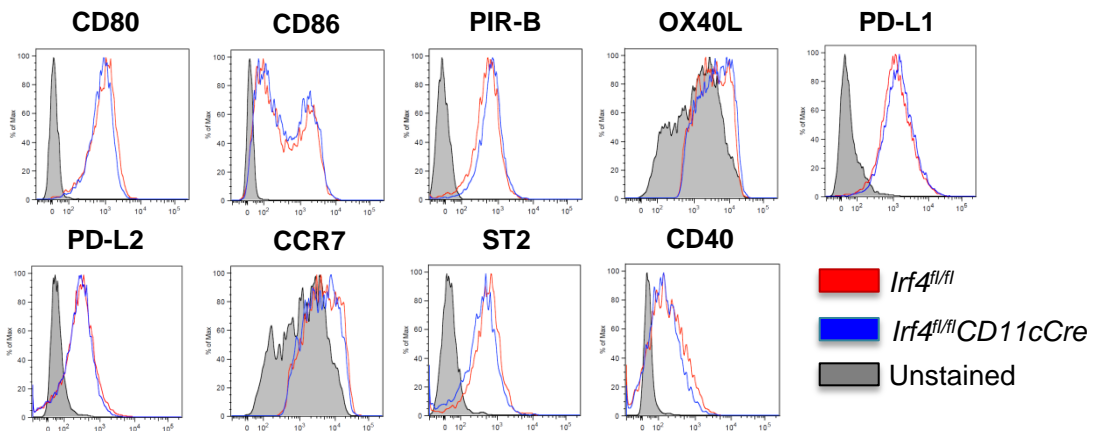

**Supplementary Figure S6: Phenotypic analysis of GM-CSF and Flt3L-derived *Irf4*<sup>fl/fl</sup>CD11cCre BMDCs following HDM stimulation.** (A) GM-CSF-derived and (B) Flt3L-derived BMDCs from *Irf4*<sup>fl/fl</sup> or *Irf4*<sup>fl/fl</sup>CD11cCre mice were assayed for expression of activation molecules following HDM-treatment. Data are representative of three unique experiments.
